# Supplementary material for: Assessment and verification of commercially available pressure cookers for laboratory sterilization
Source: PubMed Central journal article supplement (PMC6289433; doi:10.1371/journal.pone.0208769), 2018-12-11

Before sterilization

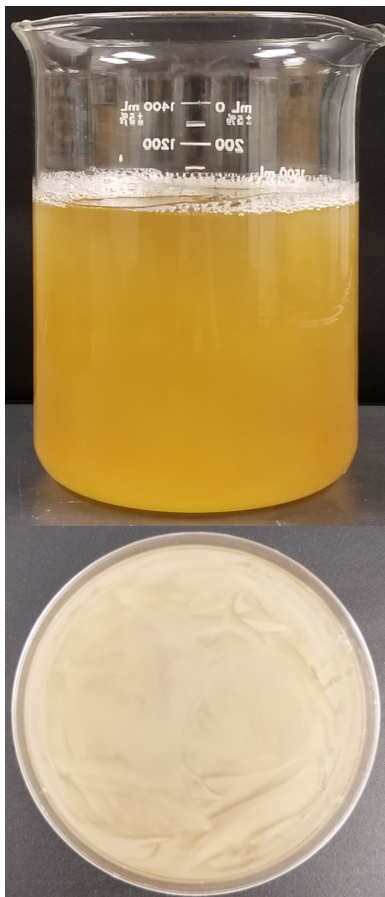

After sterilization

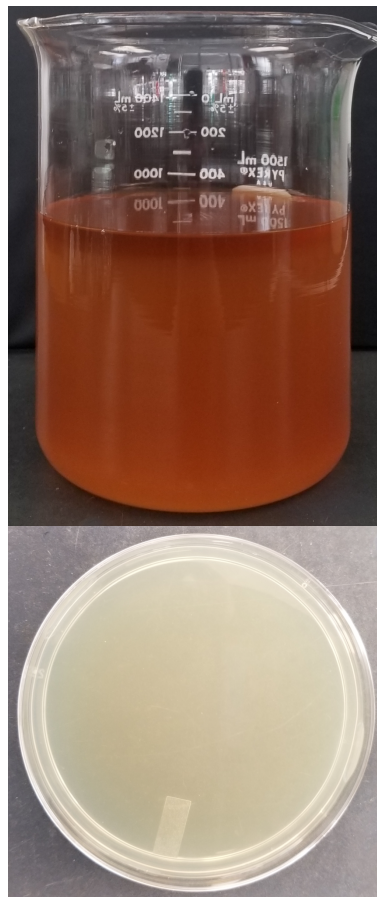

Supplement: pone.0208769.s002.pdf [file pone.0208769.s002.pdf]
